# Supplementary material
Source: HighWire-hosted journal article supplement (https://jnm.snmjournals.org/highwire/filestream/103475/field_highwire_adjunct_files/0/256719_Supplemental_Data.pdf)
Supplement: 256719_Supplemental_Data.pdf [file 256719_Supplemental_Data.pdf]

**Supplemental Table 1:** <sup>18</sup>F-FDG organ-level absorbed dose coefficients (mGy/MBq) for adult female reference phantoms.

| Organ/tissue                            | Absorbed dose coefficient (mGy/MBq) |                                 |                              |                                      |
|-----------------------------------------|-------------------------------------|---------------------------------|------------------------------|--------------------------------------|
|                                         | MRCP adult female<br>(PARaDIM)      | Adult female<br>(IDAC-dose 2.1) | Adult female<br>(OLINDA 1.1) | ICRP 89 adult female<br>(OLINDA 2.1) |
| Red (active) marrow                     | 0.01213 ± 0.000014                  | 0.0143                          | 0.0119                       | 0.0123                               |
| Colon wall                              | 0.013737 ± 0.000033                 | 0.0134                          | --                           | --                                   |
| Stem cells of colon                     | 0.01302 ± 0.00023                   | --                              | --                           | --                                   |
| Right lung + left lung                  | 0.021312 ± 0.000032                 | 0.0237                          | 0.0245                       | 0.0221                               |
| Stomach wall                            | 0.012764 ± 0.000052                 | 0.0117                          | 0.0136                       | 0.0138                               |
| Stem cells of stomach                   | 0.01183 ± 0.00031                   | --                              | --                           | --                                   |
| Breast adipose + breast glandular       | 0.011768 ± 0.000031                 | 0.0114                          | 0.0105                       | 0.0101                               |
| Right ovary + left ovary                | 0.02062 ± 0.00023                   | 0.0215                          | 0.0169                       | 0.0182                               |
| Testes                                  | --                                  | --                              | --                           | --                                   |
| Urinary bladder wall                    | 0.05426 ± 0.0002                    | 0.0569                          | 0.182                        | 0.156                                |
| Urinary bladder basal cells             | 0.09012 ± 0.00088                   | --                              | --                           | --                                   |
| Esophagus wall                          | 0.01497 ± 0.00011                   | 0.016                           | --                           | 0.0154                               |
| Esophagus basal cells                   | 0.01281 ± 0.00065                   | --                              | --                           | --                                   |
| Liver                                   | 0.020802 ± 0.000027                 | 0.0218                          | 0.0268                       | 0.0271                               |
| Thyroid                                 | 0.01126 ± 0.00015                   | 0.0111                          | 0.0108                       | 0.0115                               |
| 50um endosteal region (endosteal cells) | 0.009982 ± 0.000012                 | 0.0127                          | 0.0189                       | 0.0119                               |
| Brain                                   | 0.035548 ± 0.000043                 | 0.0377                          | 0.0424                       | 0.0396                               |
| Salivary glands                         | 0.011032 ± 0.000078                 | 0.0116                          | --                           | 0.0129                               |
| Skin                                    | 0.008345 ± 0.000011                 | 0.00834                         | 0.00911                      | --                                   |
| Basal cells of skin                     | 0.006693 ± 0.000027                 | --                              | --                           | --                                   |
| Right adrenal + left adrenal            | 0.01437 ± 0.00018                   | 0.0151                          | 0.0146                       | 0.0151                               |
| ET region                               | 0.01163 ± 0.00014                   | 0.00993                         | --                           | --                                   |
| Gallbladder wall                        | 0.01432 ± 0.00022                   | 0.0165                          | 0.0149                       | 0.0143                               |
| Heart wall                              | 0.06853 ± 0.00011                   | 0.0687                          | 0.0874                       | 0.0821                               |
| Right kidney + left kidney              | 0.012808 ± 0.000038                 | 0.0124                          | 0.0129                       | 0.013                                |
| Systemic lymph nodes                    | 0.014099 ± 0.00006                  | 0.0146                          | --                           | --                                   |

|                                                          |                      |         |        |        |
|----------------------------------------------------------|----------------------|---------|--------|--------|
| Muscle                                                   | 0.010937 ± 0.0000057 | 0.0114  | 0.0121 | --     |
| Oral mucosa                                              | 0.01019 ± 0.00059    | 0.0112  | --     | --     |
| Pancreas                                                 | 0.013396 ± 0.000062  | 0.013   | 0.0151 | 0.0151 |
| Prostate                                                 | --                   | --      | --     | --     |
| Small intestine wall                                     | 0.014844 ± 0.000028  | 0.0145  | 0.0138 | 0.0138 |
| Stem cells of small intestine                            | 0.01358 ± 0.0002     | --      | --     | --     |
| Spleen                                                   | 0.012479 ± 0.000054  | 0.0115  | 0.0128 | 0.0126 |
| Thymus                                                   | 0.0137 ± 0.00016     | 0.0146  | 0.0138 | 0.0158 |
| Uterus/cervix                                            | 0.02771 ± 0.00011    | 0.03    | 0.0213 | 0.0259 |
| Tongue                                                   | 0.011183 ± 0.000086  | 0.00823 | --     | --     |
| Tonsils                                                  | 0.01218 ± 0.00037    | 0.0122  | --     | --     |
| Right colon wall (ascending + right transverse)          | 0.012307 ± 0.00005   | 0.0115  | 0.0144 | 0.0143 |
| Left colon wall (left transverse + descending)           | 0.012376 ± 0.00005   | 0.0119  | 0.0169 | 0.0155 |
| Rectosigmoid colon wall (sigmoid + rectum)               | 0.019514 ± 0.000085  | 0.0202  | --     | --     |
| Stem cells of right colon (ascending + right transverse) | 0.01104 ± 0.00032    | --      | --     | --     |
| Stem cells of left colon (left transverse + descending)  | 0.01157 ± 0.00041    | --      | --     | --     |
| Stem cells of rectosigmoid colon (sigmoid + rectum)      | 0.01861 ± 0.00057    | --      | --     | 0.0256 |
| Basal cells of anterior nasal passages                   | 0.01 ± 0.0019        | 0.00727 | --     | --     |
| Basal cells of posterior nasal passages + pharynx        | 0.01303 ± 0.00088    | 0.00993 | --     | --     |
| Extrathoracic lymph nodes                                | 0.01264 ± 0.00018    | 0.00766 | --     | --     |
| Bronchial basal cells                                    | 0.0214 ± 0.0015      | 0.0206  | --     | --     |
| Bronchial secretory cells                                | 0.0213 ± 0.0015      | 0.0206  | --     | --     |
| Bronchiolar secretory cells                              | --                   | 0.0252  | --     | --     |
| Alveolar-interstitium                                    | 0.021312 ± 0.000032  | 0.0252  | --     | --     |
| Thoracic lymph nodes                                     | 0.01375 ± 0.00019    | 0.0127  | --     | --     |
| Right lung lobe                                          | 0.021223 ± 0.000042  | --      | --     | --     |
| Left lung lobe                                           | 0.02142 ± 0.000047   | --      | --     | --     |
| Right adrenal gland                                      | 0.01433 ± 0.00024    | --      | --     | --     |

|                                          |                       |         |        |        |
|------------------------------------------|-----------------------|---------|--------|--------|
| Left adrenal gland                       | 0.01441 ± 0.00027     | --      | --     | --     |
| Right breast adipose                     | 0.010936 ± 0.000054   | --      | --     | --     |
| Right breast glandular                   | 0.011192 ± 0.000069   | --      | --     | --     |
| Left breast adipose                      | 0.011576 ± 0.000056   | --      | --     | --     |
| Left breast glandular                    | 0.012056 ± 0.000071   | --      | --     | --     |
| Right breast (adipose + glandular)       | 0.011039 ± 0.000042   | --      | --     | --     |
| Left breast (adipose + glandular)        | 0.011768 ± 0.000044   | --      | --     | --     |
| Breast (adipose)                         | 0.011576 ± 0.000039   | --      | --     | --     |
| Breast (glandular)                       | 0.012056 ± 0.00005    | --      | --     | --     |
| Entire lenses of eye                     | 0.01094 ± 0.00088     | 0.00926 | --     | 0.0129 |
| Sensitive lenses of eye                  | 0.0131 ± 0.0021       | --      | --     | --     |
| Right kidney cortex                      | 0.013276 ± 0.000065   | --      | --     | --     |
| Right kidney medulla                     | 0.01315 ± 0.00012     | --      | --     | --     |
| Right kidney pelvis                      | 0.01371 ± 0.00027     | --      | --     | --     |
| Right kidney (cortex + medulla + pelvis) | 0.013268 ± 0.000056   | --      | --     | --     |
| Left kidney cortex                       | 0.01241 ± 0.000058    | --      | --     | --     |
| Left kidney medulla                      | 0.01248 ± 0.00011     | --      | --     | --     |
| Left kidney pelvis                       | 0.01235 ± 0.00024     | --      | --     | --     |
| Left kidney (cortex + medulla + pelvis)  | 0.012421 ± 0.000051   | --      | --     | --     |
| Right ovary                              | 0.02006 ± 0.00032     | --      | --     | --     |
| Left ovary                               | 0.02062 ± 0.00033     | --      | --     | --     |
| Pituitary gland                          | 0.0215 ± 0.0011       | 0.0217  | --     | --     |
| Spinal cord                              | 0.01271 ± 0.00015     | --      | --     | --     |
| Ureters                                  | 0.0153 ± 0.00018      | 0.0166  | --     | --     |
| Adipose/residual tissue                  | 0.0104791 ± 0.0000047 | 0.0107  | --     | --     |
| Total body                               | 0.0122857 ± 0.0000033 | --      | 0.0139 | 0.0141 |
| $e_{DW}$ or $e$ (mSv/MBq)                | 0.0183177 ± 0.0000033 | 0.0161  | 0.0241 | 0.0206 |

**Supplemental Table 2:** <sup>18</sup>F-FDG organ-level absorbed dose coefficients (mGy/MBq) for adult male reference phantoms.

| Organ/tissue                            | Absorbed dose coefficient (mGy/MBq) |                               |                            |                                    |
|-----------------------------------------|-------------------------------------|-------------------------------|----------------------------|------------------------------------|
|                                         | MRCP adult male<br>(PARaDIM)        | Adult male<br>(IDAC-dose 2.1) | Adult male<br>(OLINDA 1.1) | ICRP 89 adult male<br>(OLINDA 2.1) |
| Red (active) marrow                     | 0.010647 ± 0.000012                 | 0.0127                        | 0.00959                    | 0.0104                             |
| Colon wall                              | 0.01174 ± 0.000029                  | 0.0107                        | --                         | --                                 |
| Stem cells of colon                     | 0.01085 ± 0.00021                   | --                            | --                         | --                                 |
| Right lung + left lung                  | 0.01759 ± 0.000026                  | 0.0188                        | 0.0193                     | 0.0176                             |
| Stomach wall                            | 0.011973 ± 0.000046                 | 0.0107                        | 0.0107                     | 0.0124                             |
| Stem cells of stomach                   | 0.01016 ± 0.00026                   | --                            | --                         | --                                 |
| Breast adipose + breast glandular       | 0.00865 ± 0.00011                   | 0.00874                       | 0.00827                    | --                                 |
| Right ovary + left ovary                | --                                  | --                            | 0.0135                     | --                                 |
| Testes                                  | 0.009375 ± 0.000098                 | 0.00943                       | 0.0105                     | 0.0102                             |
| Urinary bladder wall                    | 0.05002 ± 0.00017                   | 0.0536                        | 0.132                      | 0.136                              |
| Urinary bladder basal cells             | 0.08941 ± 0.00091                   | --                            | --                         | --                                 |
| Esophagus wall                          | 0.013262 ± 0.000092                 | 0.0138                        | --                         | 0.0127                             |
| Esophagus basal cells                   | 0.01274 ± 0.00063                   | --                            | --                         | --                                 |
| Liver                                   | 0.017163 ± 0.000021                 | 0.0179                        | 0.0205                     | 0.0219                             |
| Thyroid                                 | 0.00958 ± 0.00013                   | 0.00935                       | 0.0096                     | 0.0101                             |
| 50um endosteal region (endosteal cells) | 0.0085496 ± 0.0000095               | 0.0111                        | 0.0145                     | 0.0105                             |
| Brain                                   | 0.032021 ± 0.000038                 | 0.034                         | 0.0368                     | 0.0356                             |
| Salivary glands                         | 0.00868 ± 0.000063                  | 0.00916                       | --                         | 0.0114                             |
| Skin                                    | 0.0070636 ± 0.0000083               | 0.007                         | 0.00736                    | --                                 |
| Basal cells of skin                     | 0.005614 ± 0.000023                 | --                            | --                         | --                                 |
| Right adrenal + left adrenal            | 0.01102 ± 0.00015                   | 0.0119                        | 0.0116                     | 0.0123                             |
| ET region                               | 0.009422 ± 0.00009                  | 0.00858                       | --                         | --                                 |
| Gallbladder wall                        | 0.01196 ± 0.00018                   | 0.0141                        | 0.0125                     | 0.014                              |
| Heart wall                              | 0.053279 ± 0.000085                 | 0.0532                        | 0.0674                     | 0.0634                             |
| Right kidney + left kidney              | 0.011098 ± 0.000032                 | 0.0104                        | 0.0103                     | 0.0107                             |
| Systemic lymph nodes                    | 0.012935 ± 0.000052                 | 0.0133                        | --                         | --                                 |

|                                                          |                       |         |         |        |
|----------------------------------------------------------|-----------------------|---------|---------|--------|
| Muscle                                                   | 0.0090788 ± 0.0000037 | 0.00939 | 0.00974 | --     |
| Oral mucosa                                              | 0.00888 ± 0.00047     | 0.00973 | --      | --     |
| Pancreas                                                 | 0.012247 ± 0.000054   | 0.0118  | 0.0121  | 0.0126 |
| Prostate                                                 | 0.02352 ± 0.00021     | 0.0261  | --      | 0.0182 |
| Small intestine wall                                     | 0.012067 ± 0.000022   | 0.0114  | 0.0117  | 0.0122 |
| Stem cells of small intestine                            | 0.01109 ± 0.00016     | --      | --      | --     |
| Spleen                                                   | 0.011052 ± 0.000045   | 0.00979 | 0.01    | 0.0101 |
| Thymus                                                   | 0.01171 ± 0.00013     | 0.0116  | 0.011   | 0.0133 |
| Uterus/cervix                                            | --                    | --      | 0.0179  | --     |
| Tongue                                                   | 0.00931 ± 0.00007     | 0.00751 | --      | --     |
| Tonsils                                                  | 0.01217 ± 0.00037     | 0.0127  | --      | --     |
| Right colon wall (ascending + right transverse)          | 0.010522 ± 0.000043   | 0.00955 | 0.0114  | 0.0117 |
| Left colon wall (left transverse + descending)           | 0.009657 ± 0.000042   | 0.00854 | 0.0134  | 0.0113 |
| Rectosigmoid colon wall (sigmoid + rectum)               | 0.017655 ± 0.000078   | 0.0175  | --      | --     |
| Stem cells of right colon (ascending + right transverse) | 0.00988 ± 0.00032     | --      | --      | --     |
| Stem cells of left colon (left transverse + descending)  | 0.00911 ± 0.00034     | --      | --      | --     |
| Stem cells of rectosigmoid colon (sigmoid + rectum)      | 0.01457 ± 0.00048     | --      | --      | 0.0157 |
| Basal cells of anterior nasal passages                   | 0.0087 ± 0.0011       | 0.00524 | --      | --     |
| Basal cells of posterior nasal passages + pharynx        | 0.01061 ± 0.00065     | 0.00858 | --      | --     |
| Extrathoracic lymph nodes                                | 0.01058 ± 0.00015     | 0.00585 | --      | --     |
| Bronchial basal cells                                    | 0.01575 ± 0.00084     | 0.015   | --      | --     |
| Bronchial secretory cells                                | 0.01569 ± 0.00084     | 0.015   | --      | --     |
| Bronchiolar secretory cells                              | --                    | 0.0207  | --      | --     |
| Alveolar-interstitium                                    | 0.01759 ± 0.000026    | 0.0206  | --      | --     |
| Thoracic lymph nodes                                     | 0.01222 ± 0.00016     | 0.0108  | --      | --     |
| Right lung lobe                                          | 0.017566 ± 0.000035   | --      | --      | --     |
| Left lung lobe                                           | 0.017619 ± 0.000039   | --      | --      | --     |
| Right adrenal gland                                      | 0.01204 ± 0.00022     | --      | --      | --     |

|                                          |                       |         |        |        |
|------------------------------------------|-----------------------|---------|--------|--------|
| Left adrenal gland                       | 0.01102 ± 0.00021     | --      | --     | --     |
| Right breast adipose                     | 0.00909 ± 0.00021     | --      | --     | --     |
| Right breast glandular                   | 0.00788 ± 0.00023     | --      | --     | --     |
| Left breast adipose                      | 0.00903 ± 0.00021     | --      | --     | --     |
| Left breast glandular                    | 0.00808 ± 0.00024     | --      | --     | --     |
| Right breast (adipose + glandular)       | 0.0086 ± 0.00016      | --      | --     | --     |
| Left breast (adipose + glandular)        | 0.00865 ± 0.00016     | --      | --     | --     |
| Breast (adipose)                         | 0.00903 ± 0.00015     | --      | --     | --     |
| Breast (glandular)                       | 0.00808 ± 0.00017     | --      | --     | --     |
| Entire lenses of eye                     | 0.00927 ± 0.00082     | 0.00811 | --     | 0.0103 |
| Sensitive lenses of eye                  | 0.0064 ± 0.0015       | --      | --     | --     |
| Right kidney cortex                      | 0.011438 ± 0.000053   | --      | --     | --     |
| Right kidney medulla                     | 0.01168 ± 0.0001      | --      | --     | --     |
| Right kidney pelvis                      | 0.01224 ± 0.00023     | --      | --     | --     |
| Right kidney (cortex + medulla + pelvis) | 0.011512 ± 0.000046   | --      | --     | --     |
| Left kidney cortex                       | 0.010648 ± 0.000051   | --      | --     | --     |
| Left kidney medulla                      | 0.01073 ± 0.0001      | --      | --     | --     |
| Left kidney pelvis                       | 0.01088 ± 0.00022     | --      | --     | --     |
| Left kidney (cortex + medulla + pelvis)  | 0.010672 ± 0.000045   | --      | --     | --     |
| Right ovary                              | --                    | --      | --     | --     |
| Left ovary                               | --                    | --      | --     | --     |
| Pituitary gland                          | 0.01833 ± 0.00098     | 0.0197  | --     | --     |
| Spinal cord                              | 0.010817 ± 0.0001     | --      | --     | --     |
| Ureters                                  | 0.01463 ± 0.00017     | 0.0146  | --     | --     |
| Adipose/residual tissue                  | 0.0093647 ± 0.0000047 | 0.0096  | --     | --     |
| Total body                               | 0.0104552 ± 0.0000027 | --      | 0.0112 | 0.0109 |
| $e_{DW}$ or $e$ (mSv/MBq)                | 0.0151539 ± 0.0000033 | 0.0161  | 0.0185 | 0.016  |

**Supplemental Table 3:** <sup>18</sup>F-FDG organ-level absorbed dose coefficients (mGy/MBq) for the 10<sup>th</sup> percentile standing height adult female PSPs.

| Organ/tissue                            | Absorbed dose coefficient (mGy/MBq)    |                                        |                                        |
|-----------------------------------------|----------------------------------------|----------------------------------------|----------------------------------------|
|                                         | H10 / W10 female<br>(155 cm / 44.2 kg) | H10 / W50 female<br>(155 cm / 58.2 kg) | H10 / W90 female<br>(155 cm / 82.6 kg) |
| Red (active) marrow                     | 0.015334 ± 0.000018                    | 0.012833 ± 0.000015                    | 0.010297 ± 0.000012                    |
| Colon wall                              | 0.017473 ± 0.000042                    | 0.014658 ± 0.000035                    | 0.011937 ± 0.000028                    |
| Stem cells of colon                     | 0.01653 ± 0.00029                      | 0.01435 ± 0.00025                      | 0.01167 ± 0.00022                      |
| Right lung + left lung                  | 0.026091 ± 0.00004                     | 0.022572 ± 0.000033                    | 0.019841 ± 0.000029                    |
| Stomach wall                            | 0.016024 ± 0.000065                    | 0.013563 ± 0.000055                    | 0.011242 ± 0.000045                    |
| Stem cells of stomach                   | 0.01398 ± 0.00037                      | 0.0119 ± 0.00031                       | 0.01012 ± 0.00026                      |
| Breast adipose + breast glandular       | 0.014271 ± 0.000041                    | 0.011565 ± 0.000031                    | 0.009342 ± 0.000022                    |
| Right ovary + left ovary                | 0.02499 ± 0.00029                      | 0.02031 ± 0.00024                      | 0.01608 ± 0.00019                      |
| Testes                                  | --                                     | --                                     | --                                     |
| Urinary bladder wall                    | 0.06589 ± 0.00024                      | 0.05637 ± 0.0002                       | 0.04839 ± 0.00018                      |
| Urinary bladder basal cells             | 0.11854 ± 0.001                        | 0.10008 ± 0.00085                      | 0.08589 ± 0.00074                      |
| Esophagus wall                          | 0.01894 ± 0.00014                      | 0.01574 ± 0.00011                      | 0.013079 ± 0.000094                    |
| Esophagus basal cells                   | 0.01782 ± 0.00086                      | 0.0154 ± 0.00075                       | 0.01266 ± 0.00064                      |
| Liver                                   | 0.025256 ± 0.000033                    | 0.022164 ± 0.000029                    | 0.019771 ± 0.000024                    |
| Thyroid                                 | 0.01408 ± 0.00019                      | 0.01189 ± 0.00016                      | 0.00926 ± 0.00013                      |
| 50um endosteal region (endosteal cells) | 0.012432 ± 0.000015                    | 0.010259 ± 0.000013                    | 0.008124 ± 0.00001                     |
| Brain                                   | 0.037615 ± 0.000045                    | 0.036608 ± 0.000044                    | 0.035228 ± 0.000042                    |
| Salivary glands                         | 0.013904 ± 0.000096                    | 0.011245 ± 0.00008                     | 0.008813 ± 0.000067                    |
| Skin                                    | 0.011073 ± 0.000014                    | 0.008728 ± 0.000011                    | 0.006281 ± 0.0000084                   |
| Basal cells of skin                     | 0.008799 ± 0.000034                    | 0.006952 ± 0.000029                    | 0.005219 ± 0.000022                    |
| Right adrenal + left adrenal            | 0.01784 ± 0.00023                      | 0.01475 ± 0.00019                      | 0.01197 ± 0.00015                      |
| ET region                               | 0.01445 ± 0.00017                      | 0.01181 ± 0.00015                      | 0.00927 ± 0.00012                      |
| Gallbladder wall                        | 0.01846 ± 0.00029                      | 0.01575 ± 0.00024                      | 0.01268 ± 0.0002                       |
| Heart wall                              | 0.0849 ± 0.00014                       | 0.07222 ± 0.00012                      | 0.06295 ± 0.0001                       |
| Right kidney + left kidney              | 0.016184 ± 0.000047                    | 0.013585 ± 0.000039                    | 0.010749 ± 0.000031                    |
| Systemic lymph nodes                    | 0.01784 ± 0.000074                     | 0.014961 ± 0.000061                    | 0.012048 ± 0.000049                    |

|                                                          |                      |                      |                       |
|----------------------------------------------------------|----------------------|----------------------|-----------------------|
| Muscle                                                   | 0.013979 ± 0.0000056 | 0.011284 ± 0.0000056 | 0.0086685 ± 0.0000043 |
| Oral mucosa                                              | 0.01264 ± 0.0007     | 0.00997 ± 0.00058    | 0.00769 ± 0.00051     |
| Pancreas                                                 | 0.016924 ± 0.000078  | 0.014136 ± 0.000065  | 0.011366 ± 0.000051   |
| Prostate                                                 | --                   | --                   | --                    |
| Small intestine wall                                     | 0.018565 ± 0.000035  | 0.015591 ± 0.000029  | 0.012732 ± 0.000024   |
| Stem cells of small intestine                            | 0.01702 ± 0.00024    | 0.01417 ± 0.00021    | 0.01193 ± 0.00018     |
| Spleen                                                   | 0.015641 ± 0.000069  | 0.013071 ± 0.000056  | 0.010608 ± 0.000046   |
| Thymus                                                   | 0.01691 ± 0.0002     | 0.01481 ± 0.00017    | 0.01172 ± 0.00013     |
| Uterus/cervix                                            | 0.03418 ± 0.00014    | 0.0289 ± 0.00012     | 0.023798 ± 0.000095   |
| Tongue                                                   | 0.01415 ± 0.00011    | 0.011383 ± 0.000089  | 0.008811 ± 0.000072   |
| Tonsils                                                  | 0.01554 ± 0.00046    | 0.01158 ± 0.00037    | 0.00973 ± 0.00032     |
| Right colon wall (ascending + right transverse)          | 0.015622 ± 0.000063  | 0.013245 ± 0.000052  | 0.010818 ± 0.000043   |
| Left colon wall (left transverse + descending)           | 0.015855 ± 0.000065  | 0.013315 ± 0.000054  | 0.010855 ± 0.000043   |
| Rectosigmoid colon wall (sigmoid + rectum)               | 0.02449 ± 0.00013    | 0.02018 ± 0.00011    | 0.016496 ± 0.000089   |
| Stem cells of right colon (ascending + right transverse) | 0.01434 ± 0.0004     | 0.01237 ± 0.00034    | 0.00984 ± 0.00029     |
| Stem cells of left colon (left transverse + descending)  | 0.01458 ± 0.0005     | 0.0124 ± 0.00042     | 0.01078 ± 0.00037     |
| Stem cells of rectosigmoid colon (sigmoid + rectum)      | 0.02316 ± 0.0007     | 0.0206 ± 0.00064     | 0.0163 ± 0.00053      |
| Basal cells of anterior nasal passages                   | 0.0131 ± 0.0028      | 0.0112 ± 0.002       | 0.0066 ± 0.0016       |
| Basal cells of posterior nasal passages + pharynx        | 0.025 ± 0.0026       | 0.0187 ± 0.0021      | 0.0152 ± 0.0017       |
| Extrathoracic lymph nodes                                | 0.01589 ± 0.00022    | 0.01344 ± 0.00019    | 0.01058 ± 0.00016     |
| Bronchial basal cells                                    | 0.0247 ± 0.0017      | 0.0187 ± 0.0014      | 0.0166 ± 0.0013       |
| Bronchial secretory cells                                | 0.024 ± 0.0018       | 0.0202 ± 0.0015      | 0.0166 ± 0.0014       |
| Bronchiolar secretory cells                              | --                   | --                   | --                    |
| Alveolar-interstitium                                    | 0.026091 ± 0.00004   | 0.022572 ± 0.000033  | 0.019841 ± 0.000029   |
| Thoracic lymph nodes                                     | 0.01722 ± 0.00024    | 0.01488 ± 0.0002     | 0.01148 ± 0.00016     |
| Right lung lobe                                          | 0.025962 ± 0.000055  | 0.022524 ± 0.000045  | 0.019797 ± 0.00004    |
| Left lung lobe                                           | 0.026249 ± 0.000058  | 0.022631 ± 0.00005   | 0.019895 ± 0.000044   |
| Right adrenal gland                                      | 0.01785 ± 0.00031    | 0.01482 ± 0.00025    | 0.01192 ± 0.0002      |



|                                          |                       |                       |                       |
|------------------------------------------|-----------------------|-----------------------|-----------------------|
| Left adrenal gland                       | 0.01783 ± 0.00034     | 0.01465 ± 0.00028     | 0.01203 ± 0.00023     |
| Right breast adipose                     | 0.014238 ± 0.000077   | 0.011474 ± 0.000055   | 0.009286 ± 0.000036   |
| Right breast glandular                   | 0.014311 ± 0.000087   | 0.011711 ± 0.000073   | 0.009482 ± 0.000058   |
| Left breast adipose                      | 0.014691 ± 0.000078   | 0.011993 ± 0.000056   | 0.009793 ± 0.000037   |
| Left breast glandular                    | 0.015602 ± 0.00009    | 0.01262 ± 0.000074    | 0.010257 ± 0.000061   |
| Right breast (adipose + glandular)       | 0.014271 ± 0.000058   | 0.011565 ± 0.000044   | 0.009342 ± 0.000031   |
| Left breast (adipose + glandular)        | 0.015107 ± 0.000059   | 0.012233 ± 0.000045   | 0.009925 ± 0.000032   |
| Breast (adipose)                         | 0.014238 ± 0.000054   | 0.011474 ± 0.000039   | 0.009286 ± 0.000026   |
| Breast (glandular)                       | 0.014311 ± 0.000062   | 0.011711 ± 0.000051   | 0.009482 ± 0.000041   |
| Entire lenses of eye                     | 0.0127 ± 0.001        | 0.0121 ± 0.001        | 0.00635 ± 0.00064     |
| Sensitive lenses of eye                  | 0.0101 ± 0.002        | 0.0113 ± 0.002        | 0.0072 ± 0.0015       |
| Right kidney cortex                      | 0.016678 ± 0.000082   | 0.013987 ± 0.000069   | 0.011172 ± 0.000055   |
| Right kidney medulla                     | 0.01676 ± 0.00016     | 0.01413 ± 0.00013     | 0.01126 ± 0.00011     |
| Right kidney pelvis                      | 0.0168 ± 0.00035      | 0.0142 ± 0.00028      | 0.01125 ± 0.00023     |
| Right kidney (cortex + medulla + pelvis) | 0.016698 ± 0.000071   | 0.014022 ± 0.000059   | 0.011192 ± 0.000048   |
| Left kidney cortex                       | 0.015602 ± 0.000073   | 0.013165 ± 0.000062   | 0.010312 ± 0.000049   |
| Left kidney medulla                      | 0.01551 ± 0.00014     | 0.01296 ± 0.00012     | 0.010182 ± 0.000092   |
| Left kidney pelvis                       | 0.01623 ± 0.00031     | 0.01289 ± 0.00025     | 0.01029 ± 0.0002      |
| Left kidney (cortex + medulla + pelvis)  | 0.015608 ± 0.000064   | 0.013114 ± 0.000053   | 0.010286 ± 0.000043   |
| Right ovary                              | 0.02499 ± 0.00041     | 0.02031 ± 0.00033     | 0.01608 ± 0.00027     |
| Left ovary                               | 0.0255 ± 0.00041      | 0.02167 ± 0.00034     | 0.01676 ± 0.00027     |
| Pituitary gland                          | 0.0228 ± 0.0012       | 0.0225 ± 0.0011       | 0.01731 ± 0.00089     |
| Spinal cord                              | 0.01572 ± 0.00019     | 0.01299 ± 0.00016     | 0.01042 ± 0.00013     |
| Ureters                                  | 0.01981 ± 0.00023     | 0.01624 ± 0.00018     | 0.01304 ± 0.00015     |
| Adipose/residual tissue                  | 0.013802 ± 0.000055   | 0.010997 ± 0.000044   | 0.0083336 ± 0.000025  |
| Total body                               | 0.0158901 ± 0.0000039 | 0.0127871 ± 0.0000033 | 0.0097375 ± 0.0000022 |
| $e_{DW}$ or $e$ (mSv/MBq)                | 0.0251598 ± 0.0000049 | 0.0212562 ± 0.0000035 | 0.0177345 ± 0.0000026 |

**Supplemental Table 4:** <sup>18</sup>F-FDG organ-level absorbed dose coefficients (mGy/MBq) for the 50<sup>th</sup> percentile standing height adult female PSPs.

| Organ/tissue                            | Absorbed dose coefficient (mGy/MBq)    |                                        |                                        |
|-----------------------------------------|----------------------------------------|----------------------------------------|----------------------------------------|
|                                         | H50 / W10 female<br>(163 cm / 49.9 kg) | H50 / W50 female<br>(163 cm / 64.1 kg) | H50 / W90 female<br>(163 cm / 88.4 kg) |
| Red (active) marrow                     | 0.013634 ± 0.000016                    | 0.011682 ± 0.000014                    | 0.009585 ± 0.000011                    |
| Colon wall                              | 0.015696 ± 0.000038                    | 0.013327 ± 0.000032                    | 0.011004 ± 0.000026                    |
| Stem cells of colon                     | 0.0147 ± 0.00026                       | 0.01309 ± 0.00024                      | 0.01083 ± 0.0002                       |
| Right lung + left lung                  | 0.023533 ± 0.000036                    | 0.020768 ± 0.000031                    | 0.018083 ± 0.000027                    |
| Stomach wall                            | 0.014479 ± 0.000059                    | 0.012473 ± 0.000049                    | 0.010142 ± 0.000041                    |
| Stem cells of stomach                   | 0.0128 ± 0.00034                       | 0.01154 ± 0.0003                       | 0.00932 ± 0.00025                      |
| Breast adipose + breast glandular       | 0.012993 ± 0.000037                    | 0.010703 ± 0.000028                    | 0.008636 ± 0.000021                    |
| Right ovary + left ovary                | 0.02287 ± 0.00026                      | 0.01856 ± 0.00021                      | 0.01561 ± 0.00018                      |
| Testes                                  | --                                     | --                                     | --                                     |
| Urinary bladder wall                    | 0.05968 ± 0.00022                      | 0.05163 ± 0.00019                      | 0.04511 ± 0.00016                      |
| Urinary bladder basal cells             | 0.10669 ± 0.00091                      | 0.09122 ± 0.00078                      | 0.07834 ± 0.00067                      |
| Esophagus wall                          | 0.0169 ± 0.00012                       | 0.01448 ± 0.0001                       | 0.011888 ± 0.000085                    |
| Esophagus basal cells                   | 0.01591 ± 0.00077                      | 0.01396 ± 0.0007                       | 0.01156 ± 0.0006                       |
| Liver                                   | 0.022741 ± 0.00003                     | 0.020317 ± 0.000024                    | 0.017978 ± 0.000022                    |
| Thyroid                                 | 0.01313 ± 0.00017                      | 0.01062 ± 0.00014                      | 0.00867 ± 0.00012                      |
| 50um endosteal region (endosteal cells) | 0.011315 ± 0.000014                    | 0.009466 ± 0.000012                    | 0.0076684 ± 0.0000097                  |
| Brain                                   | 0.036225 ± 0.000043                    | 0.035266 ± 0.000042                    | 0.033984 ± 0.000041                    |
| Salivary glands                         | 0.012855 ± 0.000089                    | 0.010565 ± 0.000076                    | 0.00835 ± 0.000063                     |
| Skin                                    | 0.009779 ± 0.000012                    | 0.0079561 ± 0.0000099                  | 0.0058909 ± 0.0000079                  |
| Basal cells of skin                     | 0.007869 ± 0.000031                    | 0.006379 ± 0.000026                    | 0.00489 ± 0.000021                     |
| Right adrenal + left adrenal            | 0.01604 ± 0.0002                       | 0.01361 ± 0.00017                      | 0.01138 ± 0.00014                      |
| ET region                               | 0.01306 ± 0.00016                      | 0.01098 ± 0.00014                      | 0.00881 ± 0.00012                      |
| Gallbladder wall                        | 0.01583 ± 0.00025                      | 0.01346 ± 0.00021                      | 0.01173 ± 0.00018                      |
| Heart wall                              | 0.07625 ± 0.00012                      | 0.06587 ± 0.00011                      | 0.05745 ± 0.000092                     |
| Right kidney + left kidney              | 0.014645 ± 0.000043                    | 0.012384 ± 0.000035                    | 0.010012 ± 0.000029                    |
| Systemic lymph nodes                    | 0.016022 ± 0.000066                    | 0.013618 ± 0.000055                    | 0.011164 ± 0.000045                    |

|                                                          |                     |                      |                       |
|----------------------------------------------------------|---------------------|----------------------|-----------------------|
| Muscle                                                   | 0.012582 ± 0.000005 | 0.010326 ± 0.0000052 | 0.0081449 ± 0.0000041 |
| Oral mucosa                                              | 0.01257 ± 0.00071   | 0.01084 ± 0.0006     | 0.00784 ± 0.0005      |
| Pancreas                                                 | 0.015052 ± 0.000069 | 0.01295 ± 0.000058   | 0.010458 ± 0.000048   |
| Prostate                                                 | --                  | --                   | --                    |
| Small intestine wall                                     | 0.01667 ± 0.000031  | 0.014188 ± 0.000026  | 0.011796 ± 0.000022   |
| Stem cells of small intestine                            | 0.01571 ± 0.00022   | 0.01322 ± 0.00019    | 0.01096 ± 0.00016     |
| Spleen                                                   | 0.014005 ± 0.00006  | 0.012071 ± 0.000051  | 0.009742 ± 0.000042   |
| Thymus                                                   | 0.01524 ± 0.00018   | 0.01319 ± 0.00015    | 0.01058 ± 0.00012     |
| Uterus/cervix                                            | 0.03147 ± 0.00012   | 0.02679 ± 0.0001     | 0.022556 ± 0.000088   |
| Tongue                                                   | 0.012787 ± 0.000097 | 0.010506 ± 0.000083  | 0.008342 ± 0.000069   |
| Tonsils                                                  | 0.01354 ± 0.00041   | 0.01092 ± 0.00035    | 0.00932 ± 0.00031     |
| Right colon wall (ascending + right transverse)          | 0.013923 ± 0.000056 | 0.011985 ± 0.000047  | 0.010004 ± 0.000039   |
| Left colon wall (left transverse + descending)           | 0.014236 ± 0.000058 | 0.012005 ± 0.000049  | 0.009857 ± 0.00004    |
| Rectosigmoid colon wall (sigmoid + rectum)               | 0.02215 ± 0.00012   | 0.0187 ± 0.000099    | 0.015476 ± 0.000082   |
| Stem cells of right colon (ascending + right transverse) | 0.01273 ± 0.00036   | 0.01109 ± 0.00031    | 0.00925 ± 0.00027     |
| Stem cells of left colon (left transverse + descending)  | 0.0125 ± 0.00043    | 0.01185 ± 0.00041    | 0.00962 ± 0.00035     |
| Stem cells of rectosigmoid colon (sigmoid + rectum)      | 0.02119 ± 0.00064   | 0.01847 ± 0.00059    | 0.01538 ± 0.00048     |
| Basal cells of anterior nasal passages                   | 0.0149 ± 0.0023     | 0.0076 ± 0.0014      | 0.0067 ± 0.0013       |
| Basal cells of posterior nasal passages + pharynx        | 0.0244 ± 0.0025     | 0.0173 ± 0.002       | 0.0145 ± 0.0015       |
| Extrathoracic lymph nodes                                | 0.01432 ± 0.0002    | 0.01198 ± 0.00018    | 0.00997 ± 0.00015     |
| Bronchial basal cells                                    | 0.0227 ± 0.0016     | 0.0182 ± 0.0014      | 0.0151 ± 0.0011       |
| Bronchial secretory cells                                | 0.0242 ± 0.0017     | 0.017 ± 0.0013       | 0.0158 ± 0.0012       |
| Bronchiolar secretory cells                              | --                  | --                   | --                    |
| Alveolar-interstitium                                    | 0.023533 ± 0.000036 | 0.020768 ± 0.000031  | 0.018083 ± 0.000027   |
| Thoracic lymph nodes                                     | 0.01539 ± 0.00021   | 0.01346 ± 0.00018    | 0.01061 ± 0.00015     |
| Right lung lobe                                          | 0.023444 ± 0.000049 | 0.020682 ± 0.000041  | 0.01803 ± 0.000036    |
| Left lung lobe                                           | 0.023641 ± 0.000052 | 0.020872 ± 0.000046  | 0.018147 ± 0.00004    |
| Right adrenal gland                                      | 0.01601 ± 0.00027   | 0.01358 ± 0.00023    | 0.01158 ± 0.00019     |

|                                          |                       |                      |                       |
|------------------------------------------|-----------------------|----------------------|-----------------------|
| Left adrenal gland                       | 0.01608 ± 0.00031     | 0.01365 ± 0.00026    | 0.01113 ± 0.00021     |
| Right breast adipose                     | 0.012862 ± 0.000068   | 0.010552 ± 0.00005   | 0.008584 ± 0.000034   |
| Right breast glandular                   | 0.013153 ± 0.000079   | 0.010946 ± 0.000067  | 0.008761 ± 0.000054   |
| Left breast adipose                      | 0.013579 ± 0.000071   | 0.011169 ± 0.000051  | 0.008955 ± 0.000035   |
| Left breast glandular                    | 0.014177 ± 0.000081   | 0.011682 ± 0.000068  | 0.009502 ± 0.000055   |
| Right breast (adipose + glandular)       | 0.012993 ± 0.000052   | 0.010703 ± 0.00004   | 0.008636 ± 0.000029   |
| Left breast (adipose + glandular)        | 0.013847 ± 0.000053   | 0.011366 ± 0.000041  | 0.009116 ± 0.00003    |
| Breast (adipose)                         | 0.012862 ± 0.000048   | 0.010552 ± 0.000035  | 0.008584 ± 0.000024   |
| Breast (glandular)                       | 0.013153 ± 0.000056   | 0.010946 ± 0.000047  | 0.008761 ± 0.000038   |
| Entire lenses of eye                     | 0.01242 ± 0.00099     | 0.01038 ± 0.00089    | 0.00762 ± 0.00067     |
| Sensitive lenses of eye                  | 0.0116 ± 0.0019       | 0.0111 ± 0.0021      | 0.0075 ± 0.0014       |
| Right kidney cortex                      | 0.015006 ± 0.000075   | 0.012723 ± 0.000062  | 0.010385 ± 0.000051   |
| Right kidney medulla                     | 0.01485 ± 0.00014     | 0.01255 ± 0.00012    | 0.010395 ± 0.000096   |
| Right kidney pelvis                      | 0.01523 ± 0.0003      | 0.0134 ± 0.00026     | 0.01077 ± 0.00021     |
| Right kidney (cortex + medulla + pelvis) | 0.014985 ± 0.000065   | 0.012716 ± 0.000054  | 0.010402 ± 0.000044   |
| Left kidney cortex                       | 0.014221 ± 0.000067   | 0.011996 ± 0.000055  | 0.00958 ± 0.000045    |
| Left kidney medulla                      | 0.01431 ± 0.00013     | 0.01205 ± 0.00011    | 0.009548 ± 0.000086   |
| Left kidney pelvis                       | 0.01484 ± 0.00028     | 0.01215 ± 0.00023    | 0.00964 ± 0.00019     |
| Left kidney (cortex + medulla + pelvis)  | 0.014262 ± 0.000058   | 0.012012 ± 0.000048  | 0.009576 ± 0.000039   |
| Right ovary                              | 0.02287 ± 0.00037     | 0.01856 ± 0.0003     | 0.01561 ± 0.00025     |
| Left ovary                               | 0.02401 ± 0.00038     | 0.01985 ± 0.00031    | 0.01611 ± 0.00025     |
| Pituitary gland                          | 0.0206 ± 0.0011       | 0.01846 ± 0.00096    | 0.01562 ± 0.00085     |
| Spinal cord                              | 0.01433 ± 0.00017     | 0.01215 ± 0.00014    | 0.00956 ± 0.00012     |
| Ureters                                  | 0.01715 ± 0.0002      | 0.01472 ± 0.00017    | 0.01276 ± 0.00014     |
| Adipose/residual tissue                  | 0.012349 ± 0.000049   | 0.010023 ± 0.000004  | 0.0077491 ± 0.0000023 |
| Total body                               | 0.0142377 ± 0.0000035 | 0.0116895 ± 0.000003 | 0.0090949 ± 0.0000021 |
| $e_{DW}$ or $e$ (mSv/MBq)                | 0.0227877 ± 0.000004  | 0.0195576 ± 0.000003 | 0.0164682 ± 0.0000022 |

**Supplemental Table 5:** <sup>18</sup>F-FDG organ-level absorbed dose coefficients (mGy/MBq) for the 90<sup>th</sup> percentile standing height adult female PSPs.

| Organ/tissue                            | Absorbed dose coefficient (mGy/MBq)    |                                        |                                        |
|-----------------------------------------|----------------------------------------|----------------------------------------|----------------------------------------|
|                                         | H90 / W10 female<br>(172 cm / 55.7 kg) | H90 / W50 female<br>(172 cm / 69.8 kg) | H90 / W90 female<br>(172 cm / 94.1 kg) |
| Red (active) marrow                     | 0.012448 ± 0.000015                    | 0.010804 ± 0.000013                    | 0.009027 ± 0.000011                    |
| Colon wall                              | 0.014262 ± 0.000034                    | 0.01223 ± 0.000029                     | 0.010389 ± 0.000024                    |
| Stem cells of colon                     | 0.01414 ± 0.00025                      | 0.0113 ± 0.00021                       | 0.0104 ± 0.00019                       |
| Right lung + left lung                  | 0.021473 ± 0.000032                    | 0.019091 ± 0.000028                    | 0.016812 ± 0.000025                    |
| Stomach wall                            | 0.013184 ± 0.000054                    | 0.011382 ± 0.000045                    | 0.009647 ± 0.000038                    |
| Stem cells of stomach                   | 0.01151 ± 0.0003                       | 0.01026 ± 0.00027                      | 0.00833 ± 0.00022                      |
| Breast adipose + breast glandular       | 0.011798 ± 0.000033                    | 0.009898 ± 0.000026                    | 0.008348 ± 0.00002                     |
| Right ovary + left ovary                | 0.0209 ± 0.00023                       | 0.0176 ± 0.0002                        | 0.01455 ± 0.00016                      |
| Testes                                  | --                                     | --                                     | --                                     |
| Urinary bladder wall                    | 0.05467 ± 0.0002                       | 0.04784 ± 0.00017                      | 0.04204 ± 0.00015                      |
| Urinary bladder basal cells             | 0.09665 ± 0.00082                      | 0.08404 ± 0.00072                      | 0.07277 ± 0.00063                      |
| Esophagus wall                          | 0.01547 ± 0.00011                      | 0.013363 ± 0.000095                    | 0.011136 ± 0.000079                    |
| Esophagus basal cells                   | 0.01319 ± 0.00064                      | 0.01204 ± 0.00059                      | 0.01085 ± 0.00054                      |
| Liver                                   | 0.020727 ± 0.000027                    | 0.018583 ± 0.000024                    | 0.016756 ± 0.00002                     |
| Thyroid                                 | 0.01179 ± 0.00015                      | 0.00991 ± 0.00013                      | 0.00819 ± 0.00011                      |
| 50um endosteal region (endosteal cells) | 0.010297 ± 0.000013                    | 0.008808 ± 0.000011                    | 0.0072138 ± 0.0000091                  |
| Brain                                   | 0.034933 ± 0.000042                    | 0.034069 ± 0.000041                    | 0.032807 ± 0.000039                    |
| Salivary glands                         | 0.011605 ± 0.000082                    | 0.009676 ± 0.00007                     | 0.007841 ± 0.00006                     |
| Skin                                    | 0.008833 ± 0.000011                    | 0.0072457 ± 0.0000097                  | 0.0055504 ± 0.0000074                  |
| Basal cells of skin                     | 0.007097 ± 0.000028                    | 0.005917 ± 0.000025                    | 0.00457 ± 0.00002                      |
| Right adrenal + left adrenal            | 0.01465 ± 0.00018                      | 0.01278 ± 0.00016                      | 0.0104 ± 0.00013                       |
| ET region                               | 0.01197 ± 0.00015                      | 0.0103 ± 0.00013                       | 0.00833 ± 0.00011                      |
| Gallbladder wall                        | 0.01435 ± 0.00023                      | 0.01251 ± 0.00019                      | 0.01103 ± 0.00017                      |
| Heart wall                              | 0.06903 ± 0.00011                      | 0.060533 ± 0.000097                    | 0.053162 ± 0.000085                    |
| Right kidney + left kidney              | 0.013239 ± 0.000038                    | 0.011373 ± 0.000033                    | 0.009306 ± 0.000027                    |
| Systemic lymph nodes                    | 0.01462 ± 0.000059                     | 0.012566 ± 0.000051                    | 0.010473 ± 0.000042                    |

|                                                          |                      |                       |                       |
|----------------------------------------------------------|----------------------|-----------------------|-----------------------|
| Muscle                                                   | 0.011407 ± 0.0000046 | 0.0095569 ± 0.0000048 | 0.0076501 ± 0.0000038 |
| Oral mucosa                                              | 0.01047 ± 0.0006     | 0.00935 ± 0.00055     | 0.00741 ± 0.00045     |
| Pancreas                                                 | 0.013655 ± 0.000063  | 0.011765 ± 0.000054   | 0.009938 ± 0.000045   |
| Prostate                                                 | --                   | --                    | --                    |
| Small intestine wall                                     | 0.015152 ± 0.000028  | 0.013047 ± 0.000024   | 0.011025 ± 0.000021   |
| Stem cells of small intestine                            | 0.0142 ± 0.0002      | 0.01228 ± 0.00018     | 0.01046 ± 0.00015     |
| Spleen                                                   | 0.012806 ± 0.000055  | 0.011071 ± 0.000048   | 0.009014 ± 0.000039   |
| Thymus                                                   | 0.01408 ± 0.00016    | 0.01207 ± 0.00014     | 0.01025 ± 0.00011     |
| Uterus/cervix                                            | 0.02905 ± 0.00011    | 0.025108 ± 0.000098   | 0.021279 ± 0.000083   |
| Tongue                                                   | 0.011754 ± 0.000091  | 0.009838 ± 0.000077   | 0.007934 ± 0.000065   |
| Tonsils                                                  | 0.01209 ± 0.00038    | 0.00999 ± 0.00032     | 0.00825 ± 0.00027     |
| Right colon wall (ascending + right transverse)          | 0.012634 ± 0.000051  | 0.010905 ± 0.000044   | 0.009418 ± 0.000037   |
| Left colon wall (left transverse + descending)           | 0.012835 ± 0.000052  | 0.010975 ± 0.000045   | 0.009278 ± 0.000037   |
| Rectosigmoid colon wall (sigmoid + rectum)               | 0.02044 ± 0.00011    | 0.017508 ± 0.000091   | 0.014668 ± 0.000076   |
| Stem cells of right colon (ascending + right transverse) | 0.01184 ± 0.00033    | 0.00938 ± 0.00027     | 0.00926 ± 0.00026     |
| Stem cells of left colon (left transverse + descending)  | 0.01255 ± 0.00042    | 0.00985 ± 0.00036     | 0.00906 ± 0.00032     |
| Stem cells of rectosigmoid colon (sigmoid + rectum)      | 0.02056 ± 0.00063    | 0.01682 ± 0.00052     | 0.01427 ± 0.00044     |
| Basal cells of anterior nasal passages                   | 0.0079 ± 0.0016      | 0.0124 ± 0.0023       | 0.0054 ± 0.0012       |
| Basal cells of posterior nasal passages + pharynx        | 0.0212 ± 0.0023      | 0.015 ± 0.0016        | 0.014 ± 0.0015        |
| Extrathoracic lymph nodes                                | 0.01292 ± 0.00019    | 0.01144 ± 0.00017     | 0.00921 ± 0.00014     |
| Bronchial basal cells                                    | 0.0192 ± 0.0014      | 0.0146 ± 0.0011       | 0.01349 ± 0.00096     |
| Bronchial secretory cells                                | 0.0199 ± 0.0014      | 0.0154 ± 0.0012       | 0.0149 ± 0.0011       |
| Bronchiolar secretory cells                              | --                   | --                    | --                    |
| Alveolar-interstitium                                    | 0.021473 ± 0.000032  | 0.019091 ± 0.000028   | 0.016812 ± 0.000025   |
| Thoracic lymph nodes                                     | 0.01377 ± 0.00019    | 0.01216 ± 0.00016     | 0.00986 ± 0.00013     |
| Right lung lobe                                          | 0.021398 ± 0.000043  | 0.019002 ± 0.000038   | 0.016799 ± 0.000034   |
| Left lung lobe                                           | 0.021565 ± 0.000047  | 0.0192 ± 0.000042     | 0.016828 ± 0.000037   |
| Right adrenal gland                                      | 0.01466 ± 0.00025    | 0.01271 ± 0.00021     | 0.01015 ± 0.00017     |

|                                          |                       |                       |                       |
|------------------------------------------|-----------------------|-----------------------|-----------------------|
| Left adrenal gland                       | 0.01463 ± 0.00027     | 0.01287 ± 0.00024     | 0.0107 ± 0.0002       |
| Right breast adipose                     | 0.01171 ± 0.000061    | 0.009774 ± 0.000046   | 0.008345 ± 0.000033   |
| Right breast glandular                   | 0.011909 ± 0.000071   | 0.010096 ± 0.000061   | 0.008354 ± 0.00005    |
| Left breast adipose                      | 0.012213 ± 0.000062   | 0.010399 ± 0.000048   | 0.008519 ± 0.000033   |
| Left breast glandular                    | 0.012705 ± 0.000074   | 0.010872 ± 0.000062   | 0.008971 ± 0.000052   |
| Right breast (adipose + glandular)       | 0.011798 ± 0.000046   | 0.009898 ± 0.000037   | 0.008348 ± 0.000028   |
| Left breast (adipose + glandular)        | 0.012431 ± 0.000048   | 0.010581 ± 0.000038   | 0.008657 ± 0.000028   |
| Breast (adipose)                         | 0.01171 ± 0.000043    | 0.009774 ± 0.000032   | 0.008345 ± 0.000024   |
| Breast (glandular)                       | 0.011909 ± 0.000051   | 0.010096 ± 0.000043   | 0.008354 ± 0.000035   |
| Entire lenses of eye                     | 0.01234 ± 0.00095     | 0.00791 ± 0.0007      | 0.00532 ± 0.00055     |
| Sensitive lenses of eye                  | 0.01 ± 0.0018         | 0.0081 ± 0.0015       | 0.0046 ± 0.0013       |
| Right kidney cortex                      | 0.013566 ± 0.000066   | 0.011589 ± 0.000057   | 0.009633 ± 0.000047   |
| Right kidney medulla                     | 0.01362 ± 0.00013     | 0.01171 ± 0.00011     | 0.009849 ± 0.000091   |
| Right kidney pelvis                      | 0.01353 ± 0.00027     | 0.01209 ± 0.00024     | 0.00977 ± 0.00019     |
| Right kidney (cortex + medulla + pelvis) | 0.013576 ± 0.000058   | 0.011631 ± 0.000049   | 0.00968 ± 0.000041    |
| Left kidney cortex                       | 0.012865 ± 0.00006    | 0.011054 ± 0.000051   | 0.008871 ± 0.000042   |
| Left kidney medulla                      | 0.01276 ± 0.00011     | 0.010996 ± 0.000097   | 0.00898 ± 0.00008     |
| Left kidney pelvis                       | 0.01289 ± 0.00025     | 0.01107 ± 0.00021     | 0.00897 ± 0.00017     |
| Left kidney (cortex + medulla + pelvis)  | 0.012845 ± 0.000052   | 0.011043 ± 0.000044   | 0.008896 ± 0.000036   |
| Right ovary                              | 0.0209 ± 0.00033      | 0.0176 ± 0.00028      | 0.01455 ± 0.00023     |
| Left ovary                               | 0.02142 ± 0.00033     | 0.01868 ± 0.00029     | 0.01542 ± 0.00024     |
| Pituitary gland                          | 0.01925 ± 0.00099     | 0.01849 ± 0.00095     | 0.01614 ± 0.00083     |
| Spinal cord                              | 0.01275 ± 0.00015     | 0.01137 ± 0.00013     | 0.00891 ± 0.00011     |
| Ureters                                  | 0.01607 ± 0.00019     | 0.01424 ± 0.00016     | 0.01173 ± 0.00013     |
| Adipose/residual tissue                  | 0.011153 ± 0.000045   | 0.0092322 ± 0.0000037 | 0.007372 ± 0.0000022  |
| Total body                               | 0.0129123 ± 0.0000031 | 0.0107934 ± 0.0000028 | 0.0086145 ± 0.000002  |
| $e_{DW}$ or $e$ (mSv/MBq)                | 0.0207713 ± 0.0000033 | 0.0179528 ± 0.0000025 | 0.0153921 ± 0.0000019 |

**Supplemental Table 6:** <sup>18</sup>F-FDG organ-level absorbed dose coefficients (mGy/MBq) for the 10<sup>th</sup> percentile standing height adult male PSPs.

| Organ/tissue                            | Absorbed dose coefficient (mGy/MBq)  |                                      |                                      |
|-----------------------------------------|--------------------------------------|--------------------------------------|--------------------------------------|
|                                         | H10 / W10 male<br>(167 cm / 55.9 kg) | H10 / W50 male<br>(167 cm / 70.6 kg) | H10 / W90 male<br>(167 cm / 90.2 kg) |
| Red (active) marrow                     | 0.012844 ± 0.000015                  | 0.011025 ± 0.000013                  | 0.009494 ± 0.000011                  |
| Colon wall                              | 0.014117 ± 0.000036                  | 0.012369 ± 0.000031                  | 0.010661 ± 0.000026                  |
| Stem cells of colon                     | 0.01322 ± 0.00027                    | 0.01158 ± 0.00023                    | 0.00984 ± 0.0002                     |
| Right lung + left lung                  | 0.021109 ± 0.000031                  | 0.018558 ± 0.000027                  | 0.016574 ± 0.000025                  |
| Stomach wall                            | 0.014527 ± 0.000058                  | 0.012472 ± 0.000048                  | 0.010783 ± 0.000042                  |
| Stem cells of stomach                   | 0.01258 ± 0.00032                    | 0.01079 ± 0.00028                    | 0.0093 ± 0.00024                     |
| Breast adipose + breast glandular       | 0.01084 ± 0.00015                    | 0.00946 ± 0.00012                    | 0.007787 ± 0.000086                  |
| Right ovary + left ovary                | --                                   | --                                   | --                                   |
| Testes                                  | 0.01164 ± 0.00012                    | 0.01033 ± 0.00011                    | 0.008331 ± 0.000089                  |
| Urinary bladder wall                    | 0.05952 ± 0.00021                    | 0.05232 ± 0.00018                    | 0.04675 ± 0.00016                    |
| Urinary bladder basal cells             | 0.1155 ± 0.001                       | 0.10054 ± 0.00089                    | 0.08814 ± 0.00079                    |
| Esophagus wall                          | 0.0161 ± 0.00011                     | 0.013909 ± 0.000098                  | 0.011764 ± 0.000082                  |
| Esophagus basal cells                   | 0.01451 ± 0.00073                    | 0.01101 ± 0.0006                     | 0.01188 ± 0.00062                    |
| Liver                                   | 0.020451 ± 0.000025                  | 0.018144 ± 0.000022                  | 0.01643 ± 0.00002                    |
| Thyroid                                 | 0.01184 ± 0.00016                    | 0.00994 ± 0.00013                    | 0.00822 ± 0.00011                    |
| 50um endosteal region (endosteal cells) | 0.010705 ± 0.000012                  | 0.0090691 ± 0.0000099                | 0.0076746 ± 0.0000085                |
| Brain                                   | 0.03391 ± 0.000041                   | 0.032878 ± 0.000039                  | 0.031709 ± 0.000038                  |
| Salivary glands                         | 0.011101 ± 0.000077                  | 0.009283 ± 0.000066                  | 0.007567 ± 0.000056                  |
| Skin                                    | 0.008959 ± 0.00001                   | 0.0072862 ± 0.0000084                | 0.0058335 ± 0.0000073                |
| Basal cells of skin                     | 0.007113 ± 0.000028                  | 0.005811 ± 0.000024                  | 0.004771 ± 0.000021                  |
| Right adrenal + left adrenal            | 0.01547 ± 0.00019                    | 0.01329 ± 0.00016                    | 0.01084 ± 0.00014                    |
| ET region                               | 0.01156 ± 0.00011                    | 0.00974 ± 0.000093                   | 0.00819 ± 0.000081                   |
| Gallbladder wall                        | 0.01459 ± 0.00022                    | 0.01295 ± 0.00019                    | 0.01151 ± 0.00017                    |
| Heart wall                              | 0.06487 ± 0.0001                     | 0.0564 ± 0.00009                     | 0.05 ± 0.00008                       |
| Right kidney + left kidney              | 0.013542 ± 0.000039                  | 0.011587 ± 0.000033                  | 0.00987 ± 0.000028                   |
| Systemic lymph nodes                    | 0.015907 ± 0.000061                  | 0.013696 ± 0.000052                  | 0.011844 ± 0.000044                  |



|                                                          |                      |                       |                       |
|----------------------------------------------------------|----------------------|-----------------------|-----------------------|
| Muscle                                                   | 0.011284 ± 0.0000045 | 0.0094595 ± 0.0000038 | 0.0078654 ± 0.0000031 |
| Oral mucosa                                              | 0.01094 ± 0.00059    | 0.01004 ± 0.00055     | 0.00758 ± 0.00045     |
| Pancreas                                                 | 0.014879 ± 0.000067  | 0.012685 ± 0.000056   | 0.010869 ± 0.000048   |
| Prostate                                                 | 0.0274 ± 0.00025     | 0.02483 ± 0.00022     | 0.0219 ± 0.00019      |
| Small intestine wall                                     | 0.014777 ± 0.000029  | 0.012693 ± 0.000024   | 0.011018 ± 0.000021   |
| Stem cells of small intestine                            | 0.01356 ± 0.0002     | 0.01152 ± 0.00017     | 0.01018 ± 0.00015     |
| Spleen                                                   | 0.013507 ± 0.000057  | 0.011467 ± 0.000048   | 0.009712 ± 0.000041   |
| Thymus                                                   | 0.01381 ± 0.00016    | 0.012 ± 0.00013       | 0.01015 ± 0.00011     |
| Uterus/cervix                                            | --                   | --                    | --                    |
| Tongue                                                   | 0.011388 ± 0.000085  | 0.009539 ± 0.000073   | 0.007879 ± 0.000062   |
| Tonsils                                                  | 0.01369 ± 0.00042    | 0.01141 ± 0.00036     | 0.01029 ± 0.00032     |
| Right colon wall (ascending + right transverse)          | 0.012808 ± 0.000054  | 0.011121 ± 0.000046   | 0.009653 ± 0.000039   |
| Left colon wall (left transverse + descending)           | 0.012001 ± 0.000053  | 0.010225 ± 0.000045   | 0.008719 ± 0.000038   |
| Rectosigmoid colon wall (sigmoid + rectum)               | 0.0192 ± 0.00012     | 0.016389 ± 0.000099   | 0.014234 ± 0.000086   |
| Stem cells of right colon (ascending + right transverse) | 0.01166 ± 0.00039    | 0.01061 ± 0.00034     | 0.00892 ± 0.0003      |
| Stem cells of left colon (left transverse + descending)  | 0.01146 ± 0.00044    | 0.00962 ± 0.00036     | 0.00804 ± 0.00031     |
| Stem cells of rectosigmoid colon (sigmoid + rectum)      | 0.01791 ± 0.0006     | 0.01558 ± 0.00052     | 0.01357 ± 0.00046     |
| Basal cells of anterior nasal passages                   | 0.0091 ± 0.0011      | 0.0064 ± 0.00088      | 0.00575 ± 0.00087     |
| Basal cells of posterior nasal passages + pharynx        | 0.0193 ± 0.0014      | 0.015 ± 0.0011        | 0.0149 ± 0.0012       |
| Extrathoracic lymph nodes                                | 0.01285 ± 0.00018    | 0.01092 ± 0.00016     | 0.00936 ± 0.00014     |
| Bronchial basal cells                                    | 0.0196 ± 0.001       | 0.01615 ± 0.00087     | 0.01428 ± 0.00077     |
| Bronchial secretory cells                                | 0.0201 ± 0.001       | 0.01623 ± 0.00086     | 0.01354 ± 0.00073     |
| Bronchiolar secretory cells                              | --                   | --                    | --                    |
| Alveolar-interstitium                                    | 0.021109 ± 0.000031  | 0.018558 ± 0.000027   | 0.016574 ± 0.000025   |
| Thoracic lymph nodes                                     | 0.01435 ± 0.00019    | 0.0126 ± 0.00016      | 0.01064 ± 0.00014     |
| Right lung lobe                                          | 0.021013 ± 0.000042  | 0.018512 ± 0.000037   | 0.016573 ± 0.000033   |
| Left lung lobe                                           | 0.021223 ± 0.000047  | 0.018614 ± 0.000041   | 0.016575 ± 0.000036   |
| Right adrenal gland                                      | 0.01547 ± 0.00027    | 0.01329 ± 0.00023     | 0.01084 ± 0.00019     |

|                                          |                       |                       |                       |
|------------------------------------------|-----------------------|-----------------------|-----------------------|
| Left adrenal gland                       | 0.014 ± 0.00026       | 0.01203 ± 0.00022     | 0.01 ± 0.00019        |
| Right breast adipose                     | 0.01095 ± 0.00029     | 0.0097 ± 0.00021      | 0.00794 ± 0.00015     |
| Right breast glandular                   | 0.01072 ± 0.00032     | 0.00904 ± 0.00026     | 0.00742 ± 0.00022     |
| Left breast adipose                      | 0.01154 ± 0.00029     | 0.00949 ± 0.00021     | 0.0081 ± 0.00015      |
| Left breast glandular                    | 0.0103 ± 0.0003       | 0.00855 ± 0.00026     | 0.00701 ± 0.00022     |
| Right breast (adipose + glandular)       | 0.01084 ± 0.00021     | 0.00946 ± 0.00017     | 0.00779 ± 0.00012     |
| Left breast (adipose + glandular)        | 0.01096 ± 0.00021     | 0.00913 ± 0.00016     | 0.00778 ± 0.00012     |
| Breast (adipose)                         | 0.01095 ± 0.00021     | 0.0097 ± 0.00015      | 0.00794 ± 0.0001      |
| Breast (glandular)                       | 0.01072 ± 0.00022     | 0.00904 ± 0.00019     | 0.00742 ± 0.00016     |
| Entire lenses of eye                     | 0.00977 ± 0.00085     | 0.00785 ± 0.00072     | 0.00858 ± 0.00078     |
| Sensitive lenses of eye                  | 0.0151 ± 0.0024       | 0.0063 ± 0.0011       | 0.0115 ± 0.0019       |
| Right kidney cortex                      | 0.013765 ± 0.000065   | 0.011823 ± 0.000054   | 0.010116 ± 0.000047   |
| Right kidney medulla                     | 0.01396 ± 0.00013     | 0.0121 ± 0.00011      | 0.010542 ± 0.000094   |
| Right kidney pelvis                      | 0.01397 ± 0.00027     | 0.01252 ± 0.00024     | 0.01044 ± 0.0002      |
| Right kidney (cortex + medulla + pelvis) | 0.013808 ± 0.000057   | 0.011899 ± 0.000048   | 0.010206 ± 0.000041   |
| Left kidney cortex                       | 0.013012 ± 0.000064   | 0.011093 ± 0.000054   | 0.009369 ± 0.000046   |
| Left kidney medulla                      | 0.01352 ± 0.00013     | 0.01124 ± 0.00011     | 0.009503 ± 0.00009    |
| Left kidney pelvis                       | 0.01334 ± 0.00028     | 0.01163 ± 0.00024     | 0.00969 ± 0.0002      |
| Left kidney (cortex + medulla + pelvis)  | 0.013117 ± 0.000056   | 0.011139 ± 0.000047   | 0.009405 ± 0.00004    |
| Right ovary                              | --                    | --                    | --                    |
| Left ovary                               | --                    | --                    | --                    |
| Pituitary gland                          | 0.0194 ± 0.001        | 0.01678 ± 0.00094     | 0.01457 ± 0.00083     |
| Spinal cord                              | 0.01318 ± 0.00012     | 0.01108 ± 0.0001      | 0.009424 ± 0.000088   |
| Ureters                                  | 0.0172 ± 0.0002       | 0.0149 ± 0.00017      | 0.01303 ± 0.00015     |
| Adipose/residual tissue                  | 0.012027 ± 0.000006   | 0.0096353 ± 0.0000039 | 0.0078054 ± 0.0000031 |
| Total body                               | 0.0130624 ± 0.0000033 | 0.0108538 ± 0.0000026 | 0.0090067 ± 0.0000022 |
| $e_{DW}$ or $e$ (mSv/MBq)                | 0.0199197 ± 0.0000048 | 0.0172916 ± 0.0000037 | 0.0150214 ± 0.0000028 |

**Supplemental Table 7:** <sup>18</sup>F-FDG organ-level absorbed dose coefficients (mGy/MBq) for the 50<sup>th</sup> percentile standing height adult male PSPs.

| Organ/tissue                            | Absorbed dose coefficient (mGy/MBq)  |                                      |                                      |
|-----------------------------------------|--------------------------------------|--------------------------------------|--------------------------------------|
|                                         | H50 / W10 male<br>(177 cm / 64.7 kg) | H50 / W50 male<br>(177 cm / 79.3 kg) | H50 / W90 male<br>(177 cm / 99.1 kg) |
| Red (active) marrow                     | 0.011418 ± 0.000013                  | 0.009979 ± 0.000011                  | 0.0087713 ± 0.0000099                |
| Colon wall                              | 0.012845 ± 0.000032                  | 0.011242 ± 0.000028                  | 0.009499 ± 0.000023                  |
| Stem cells of colon                     | 0.01212 ± 0.00024                    | 0.01041 ± 0.00021                    | 0.00864 ± 0.00018                    |
| Right lung + left lung                  | 0.018779 ± 0.000028                  | 0.016733 ± 0.000025                  | 0.015106 ± 0.000022                  |
| Stomach wall                            | 0.012878 ± 0.000051                  | 0.011252 ± 0.000044                  | 0.009824 ± 0.000038                  |
| Stem cells of stomach                   | 0.01046 ± 0.00028                    | 0.00967 ± 0.00025                    | 0.00858 ± 0.00022                    |
| Breast adipose + breast glandular       | 0.00966 ± 0.00013                    | 0.00847 ± 0.0001                     | 0.00701 ± 0.000078                   |
| Right ovary + left ovary                | --                                   | --                                   | --                                   |
| Testes                                  | 0.01046 ± 0.00011                    | 0.008788 ± 0.000092                  | 0.007624 ± 0.00008                   |
| Urinary bladder wall                    | 0.05359 ± 0.00019                    | 0.04784 ± 0.00016                    | 0.04298 ± 0.00015                    |
| Urinary bladder basal cells             | 0.10104 ± 0.00091                    | 0.08985 ± 0.0008                     | 0.07976 ± 0.00072                    |
| Esophagus wall                          | 0.01434 ± 0.0001                     | 0.012617 ± 0.000087                  | 0.010752 ± 0.000074                  |
| Esophagus basal cells                   | 0.01481 ± 0.00071                    | 0.01219 ± 0.00063                    | 0.00967 ± 0.00051                    |
| Liver                                   | 0.018226 ± 0.000022                  | 0.016422 ± 0.00002                   | 0.014934 ± 0.000018                  |
| Thyroid                                 | 0.01003 ± 0.00013                    | 0.00875 ± 0.00012                    | 0.00774 ± 0.0001                     |
| 50um endosteal region (endosteal cells) | 0.009515 ± 0.00001                   | 0.0079932 ± 0.0000089                | 0.0068931 ± 0.0000077                |
| Brain                                   | 0.032571 ± 0.000039                  | 0.031604 ± 0.000038                  | 0.030585 ± 0.000037                  |
| Salivary glands                         | 0.009688 ± 0.000069                  | 0.008232 ± 0.00006                   | 0.00697 ± 0.000052                   |
| Skin                                    | 0.0079062 ± 0.0000092                | 0.0064697 ± 0.0000075                | 0.0053954 ± 0.0000068                |
| Basal cells of skin                     | 0.006194 ± 0.000025                  | 0.005229 ± 0.000022                  | 0.004347 ± 0.000019                  |
| Right adrenal + left adrenal            | 0.01345 ± 0.00017                    | 0.01151 ± 0.00014                    | 0.01027 ± 0.00013                    |
| ET region                               | 0.010144 ± 0.000095                  | 0.00873 ± 0.000085                   | 0.007572 ± 0.000075                  |
| Gallbladder wall                        | 0.01303 ± 0.0002                     | 0.01166 ± 0.00017                    | 0.0103 ± 0.00015                     |
| Heart wall                              | 0.057359 ± 0.000092                  | 0.050815 ± 0.000081                  | 0.04553 ± 0.000073                   |
| Right kidney + left kidney              | 0.011979 ± 0.000035                  | 0.010421 ± 0.00003                   | 0.009009 ± 0.000026                  |
| Systemic lymph nodes                    | 0.014063 ± 0.000053                  | 0.012327 ± 0.000046                  | 0.010868 ± 0.00004                   |

|                                                          |                      |                       |                       |
|----------------------------------------------------------|----------------------|-----------------------|-----------------------|
| Muscle                                                   | 0.0099572 ± 0.000004 | 0.0085128 ± 0.0000034 | 0.0072307 ± 0.0000029 |
| Oral mucosa                                              | 0.00999 ± 0.00053    | 0.00862 ± 0.00049     | 0.00721 ± 0.00042     |
| Pancreas                                                 | 0.013128 ± 0.000058  | 0.011445 ± 0.00005    | 0.009859 ± 0.000043   |
| Prostate                                                 | 0.02484 ± 0.00023    | 0.02217 ± 0.0002      | 0.02 ± 0.00018        |
| Small intestine wall                                     | 0.013035 ± 0.000024  | 0.011482 ± 0.000021   | 0.009989 ± 0.000019   |
| Stem cells of small intestine                            | 0.01176 ± 0.00017    | 0.01066 ± 0.00016     | 0.00928 ± 0.00014     |
| Spleen                                                   | 0.011918 ± 0.00005   | 0.010315 ± 0.000043   | 0.008893 ± 0.000037   |
| Thymus                                                   | 0.01207 ± 0.00014    | 0.01061 ± 0.00012     | 0.00929 ± 0.0001      |
| Uterus/cervix                                            | --                   | --                    | --                    |
| Tongue                                                   | 0.010167 ± 0.000077  | 0.008711 ± 0.000068   | 0.007206 ± 0.000058   |
| Tonsils                                                  | 0.01271 ± 0.00039    | 0.01144 ± 0.00035     | 0.00926 ± 0.0003      |
| Right colon wall (ascending + right transverse)          | 0.011455 ± 0.000048  | 0.010087 ± 0.000042   | 0.008719 ± 0.000036   |
| Left colon wall (left transverse + descending)           | 0.010578 ± 0.000047  | 0.009258 ± 0.000041   | 0.00786 ± 0.000034    |
| Rectosigmoid colon wall (sigmoid + rectum)               | 0.01743 ± 0.00011    | 0.015117 ± 0.00009    | 0.013245 ± 0.000079   |
| Stem cells of right colon (ascending + right transverse) | 0.01078 ± 0.00034    | 0.00963 ± 0.00032     | 0.00806 ± 0.00027     |
| Stem cells of left colon (left transverse + descending)  | 0.00989 ± 0.00038    | 0.00783 ± 0.0003      | 0.00684 ± 0.00027     |
| Stem cells of rectosigmoid colon (sigmoid + rectum)      | 0.01704 ± 0.00056    | 0.0149 ± 0.0005       | 0.01182 ± 0.0004      |
| Basal cells of anterior nasal passages                   | 0.0095 ± 0.0011      | 0.0068 ± 0.0011       | 0.00519 ± 0.00076     |
| Basal cells of posterior nasal passages + pharynx        | 0.0178 ± 0.0013      | 0.0143 ± 0.0011       | 0.01258 ± 0.00097     |
| Extrathoracic lymph nodes                                | 0.01182 ± 0.00017    | 0.01026 ± 0.00014     | 0.00884 ± 0.00013     |
| Bronchial basal cells                                    | 0.01773 ± 0.00093    | 0.01382 ± 0.00074     | 0.01284 ± 0.00071     |
| Bronchial secretory cells                                | 0.01792 ± 0.00096    | 0.01378 ± 0.00074     | 0.0128 ± 0.00069      |
| Bronchiolar secretory cells                              | --                   | --                    | --                    |
| Alveolar-interstitium                                    | 0.018779 ± 0.000028  | 0.016733 ± 0.000025   | 0.015106 ± 0.000022   |
| Thoracic lymph nodes                                     | 0.01278 ± 0.00017    | 0.01128 ± 0.00014     | 0.01004 ± 0.00013     |
| Right lung lobe                                          | 0.018719 ± 0.000037  | 0.016698 ± 0.000033   | 0.015101 ± 0.00003    |
| Left lung lobe                                           | 0.01885 ± 0.000041   | 0.016775 ± 0.000037   | 0.015112 ± 0.000032   |
| Right adrenal gland                                      | 0.01345 ± 0.00024    | 0.01151 ± 0.0002      | 0.01027 ± 0.00018     |

|                                          |                       |                       |                       |
|------------------------------------------|-----------------------|-----------------------|-----------------------|
| Left adrenal gland                       | 0.01236 ± 0.00023     | 0.01036 ± 0.0002      | 0.00921 ± 0.00017     |
| Right breast adipose                     | 0.00992 ± 0.00024     | 0.00893 ± 0.00019     | 0.00724 ± 0.00013     |
| Right breast glandular                   | 0.00931 ± 0.00027     | 0.00769 ± 0.00023     | 0.00645 ± 0.00019     |
| Left breast adipose                      | 0.01036 ± 0.00024     | 0.00894 ± 0.00019     | 0.00709 ± 0.00013     |
| Left breast glandular                    | 0.00947 ± 0.00027     | 0.00713 ± 0.00022     | 0.00624 ± 0.00019     |
| Right breast (adipose + glandular)       | 0.00966 ± 0.00018     | 0.00847 ± 0.00015     | 0.00701 ± 0.00011     |
| Left breast (adipose + glandular)        | 0.00997 ± 0.00018     | 0.00827 ± 0.00014     | 0.00684 ± 0.00011     |
| Breast (adipose)                         | 0.00992 ± 0.00017     | 0.00893 ± 0.00013     | 0.007244 ± 0.000094   |
| Breast (glandular)                       | 0.00931 ± 0.00019     | 0.00769 ± 0.00016     | 0.00645 ± 0.00014     |
| Entire lenses of eye                     | 0.00872 ± 0.0008      | 0.00855 ± 0.00076     | 0.00665 ± 0.00064     |
| Sensitive lenses of eye                  | 0.0057 ± 0.0012       | 0.0085 ± 0.0016       | 0.0058 ± 0.0012       |
| Right kidney cortex                      | 0.012221 ± 0.000057   | 0.010633 ± 0.000049   | 0.009221 ± 0.000042   |
| Right kidney medulla                     | 0.01251 ± 0.00011     | 0.010988 ± 0.000098   | 0.00956 ± 0.000085    |
| Right kidney pelvis                      | 0.01232 ± 0.00024     | 0.01109 ± 0.00021     | 0.00952 ± 0.00018     |
| Right kidney (cortex + medulla + pelvis) | 0.012277 ± 0.00005    | 0.010716 ± 0.000043   | 0.009295 ± 0.000037   |
| Left kidney cortex                       | 0.011533 ± 0.000057   | 0.009948 ± 0.000049   | 0.008591 ± 0.000042   |
| Left kidney medulla                      | 0.0116 ± 0.00011      | 0.010177 ± 0.000096   | 0.008565 ± 0.000081   |
| Left kidney pelvis                       | 0.01167 ± 0.00024     | 0.0104 ± 0.00021      | 0.00874 ± 0.00018     |
| Left kidney (cortex + medulla + pelvis)  | 0.011549 ± 0.000049   | 0.010007 ± 0.000043   | 0.008591 ± 0.000037   |
| Right ovary                              | --                    | --                    | --                    |
| Left ovary                               | --                    | --                    | --                    |
| Pituitary gland                          | 0.01857 ± 0.001       | 0.01595 ± 0.00089     | 0.01588 ± 0.00084     |
| Spinal cord                              | 0.01169 ± 0.00011     | 0.010053 ± 0.000093   | 0.008673 ± 0.000081   |
| Ureters                                  | 0.01522 ± 0.00018     | 0.01332 ± 0.00015     | 0.01185 ± 0.00013     |
| Adipose/residual tissue                  | 0.010387 ± 0.0000052  | 0.0086155 ± 0.0000034 | 0.0071031 ± 0.0000028 |
| Total body                               | 0.0114761 ± 0.0000029 | 0.0100548 ± 0.0000027 | 0.0082201 ± 0.000002  |
| $e_{DW}$ or $e$ (mSv/MBq)                | 0.0176694 ± 0.0000037 | 0.0155005 ± 0.0000029 | 0.0136077 ± 0.0000023 |

**Supplemental Table 8:** <sup>18</sup>F-FDG organ-level absorbed dose coefficients (mGy/MBq) for the 90<sup>th</sup> percentile standing height adult male PSPs.

| Organ/tissue                            | Absorbed dose coefficient (mGy/MBq)  |                                      |                                       |
|-----------------------------------------|--------------------------------------|--------------------------------------|---------------------------------------|
|                                         | H90 / W10 male<br>(186 cm / 74.2 kg) | H90 / W50 male<br>(186 cm / 88.7 kg) | H90 / W90 male<br>(186 cm / 108.4 kg) |
| Red (active) marrow                     | 0.010275 ± 0.000012                  | 0.009148 ± 0.00001                   | 0.0080557 ± 0.0000091                 |
| Colon wall                              | 0.011337 ± 0.000028                  | 0.010188 ± 0.000025                  | 0.009039 ± 0.000022                   |
| Stem cells of colon                     | 0.01078 ± 0.00021                    | 0.00938 ± 0.00019                    | 0.00871 ± 0.00018                     |
| Right lung + left lung                  | 0.016896 ± 0.000025                  | 0.015254 ± 0.000022                  | 0.013866 ± 0.00002                    |
| Stomach wall                            | 0.011584 ± 0.000045                  | 0.010266 ± 0.00004                   | 0.009161 ± 0.000035                   |
| Stem cells of stomach                   | 0.00987 ± 0.00026                    | 0.00895 ± 0.00023                    | 0.00818 ± 0.00021                     |
| Breast adipose + breast glandular       | 0.00855 ± 0.00011                    | 0.007463 ± 0.000089                  | 0.006578 ± 0.000072                   |
| Right ovary + left ovary                | --                                   | --                                   | --                                    |
| Testes                                  | 0.009482 ± 0.000097                  | 0.008087 ± 0.000084                  | 0.007281 ± 0.000075                   |
| Urinary bladder wall                    | 0.04822 ± 0.00016                    | 0.04359 ± 0.00015                    | 0.03967 ± 0.00013                     |
| Urinary bladder basal cells             | 0.08945 ± 0.00081                    | 0.08046 ± 0.00072                    | 0.07213 ± 0.00066                     |
| Esophagus wall                          | 0.012929 ± 0.000089                  | 0.011432 ± 0.000078                  | 0.0099 ± 0.000068                     |
| Esophagus basal cells                   | 0.01292 ± 0.00064                    | 0.0114 ± 0.00057                     | 0.0098 ± 0.0005                       |
| Liver                                   | 0.016395 ± 0.00002                   | 0.014999 ± 0.000018                  | 0.013796 ± 0.000017                   |
| Thyroid                                 | 0.00938 ± 0.00012                    | 0.00805 ± 0.0001                     | 0.00679 ± 0.00009                     |
| 50um endosteal region (endosteal cells) | 0.0082778 ± 0.0000092                | 0.0073133 ± 0.000008                 | 0.006365 ± 0.0000071                  |
| Brain                                   | 0.031262 ± 0.000038                  | 0.030414 ± 0.000036                  | 0.029442 ± 0.000035                   |
| Salivary glands                         | 0.008616 ± 0.000062                  | 0.007558 ± 0.000055                  | 0.006411 ± 0.000049                   |
| Skin                                    | 0.0068933 ± 0.000008                 | 0.0058728 ± 0.0000068                | 0.0049031 ± 0.0000061                 |
| Basal cells of skin                     | 0.005497 ± 0.000023                  | 0.004761 ± 0.00002                   | 0.004001 ± 0.000018                   |
| Right adrenal + left adrenal            | 0.01177 ± 0.00015                    | 0.01089 ± 0.00013                    | 0.0092 ± 0.00011                      |
| ET region                               | 0.009213 ± 0.000087                  | 0.008058 ± 0.000078                  | 0.006954 ± 0.00007                    |
| Gallbladder wall                        | 0.0118 ± 0.00018                     | 0.01046 ± 0.00016                    | 0.00963 ± 0.00014                     |
| Heart wall                              | 0.051223 ± 0.000082                  | 0.046046 ± 0.000074                  | 0.041662 ± 0.000062                   |
| Right kidney + left kidney              | 0.010668 ± 0.000031                  | 0.009477 ± 0.000027                  | 0.00819 ± 0.000024                    |
| Systemic lymph nodes                    | 0.012661 ± 0.000047                  | 0.011409 ± 0.000042                  | 0.010282 ± 0.000037                   |

|                                                          |                       |                       |                       |
|----------------------------------------------------------|-----------------------|-----------------------|-----------------------|
| Muscle                                                   | 0.0088422 ± 0.0000035 | 0.0077247 ± 0.0000031 | 0.0066393 ± 0.0000027 |
| Oral mucosa                                              | 0.00843 ± 0.00046     | 0.00756 ± 0.00041     | 0.00647 ± 0.00037     |
| Pancreas                                                 | 0.011748 ± 0.000052   | 0.010397 ± 0.000045   | 0.00919 ± 0.00004     |
| Prostate                                                 | 0.02236 ± 0.0002      | 0.02022 ± 0.00018     | 0.01869 ± 0.00016     |
| Small intestine wall                                     | 0.011573 ± 0.000022   | 0.01041 ± 0.000019    | 0.009327 ± 0.000017   |
| Stem cells of small intestine                            | 0.01053 ± 0.00016     | 0.00974 ± 0.00014     | 0.00871 ± 0.00013     |
| Spleen                                                   | 0.010773 ± 0.000044   | 0.009362 ± 0.000038   | 0.00806 ± 0.000034    |
| Thymus                                                   | 0.01092 ± 0.00012     | 0.00973 ± 0.00011     | 0.00844 ± 0.000095    |
| Uterus/cervix                                            | --                    | --                    | --                    |
| Tongue                                                   | 0.008992 ± 0.000069   | 0.007778 ± 0.000061   | 0.006726 ± 0.000054   |
| Tonsils                                                  | 0.01133 ± 0.00035     | 0.01028 ± 0.00032     | 0.00934 ± 0.0003      |
| Right colon wall (ascending + right transverse)          | 0.010108 ± 0.000042   | 0.009102 ± 0.000037   | 0.00808 ± 0.000033    |
| Left colon wall (left transverse + descending)           | 0.00939 ± 0.000041    | 0.008267 ± 0.000036   | 0.007381 ± 0.000032   |
| Rectosigmoid colon wall (sigmoid + rectum)               | 0.01528 ± 0.000091    | 0.01382 ± 0.000081    | 0.01246 ± 0.000072    |
| Stem cells of right colon (ascending + right transverse) | 0.00974 ± 0.00032     | 0.00862 ± 0.00029     | 0.00808 ± 0.00027     |
| Stem cells of left colon (left transverse + descending)  | 0.00934 ± 0.00035     | 0.00786 ± 0.0003      | 0.00713 ± 0.00027     |
| Stem cells of rectosigmoid colon (sigmoid + rectum)      | 0.01425 ± 0.00048     | 0.0125 ± 0.00043      | 0.01172 ± 0.00039     |
| Basal cells of anterior nasal passages                   | 0.0078 ± 0.0011       | 0.0082 ± 0.001        | 0.00546 ± 0.00079     |
| Basal cells of posterior nasal passages + pharynx        | 0.015 ± 0.0011        | 0.0147 ± 0.0011       | 0.0128 ± 0.001        |
| Extrathoracic lymph nodes                                | 0.01045 ± 0.00015     | 0.00929 ± 0.00013     | 0.00807 ± 0.00012     |
| Bronchial basal cells                                    | 0.01587 ± 0.00081     | 0.01463 ± 0.00075     | 0.01218 ± 0.00067     |
| Bronchial secretory cells                                | 0.01553 ± 0.00082     | 0.01384 ± 0.00074     | 0.01256 ± 0.00067     |
| Bronchiolar secretory cells                              | --                    | --                    | --                    |
| Alveolar-interstitium                                    | 0.016896 ± 0.000025   | 0.015254 ± 0.000022   | 0.013866 ± 0.00002    |
| Thoracic lymph nodes                                     | 0.01164 ± 0.00015     | 0.01029 ± 0.00013     | 0.00886 ± 0.00011     |
| Right lung lobe                                          | 0.016842 ± 0.000034   | 0.015216 ± 0.00003    | 0.013877 ± 0.000028   |
| Left lung lobe                                           | 0.016961 ± 0.000037   | 0.0153 ± 0.000032     | 0.013853 ± 0.000029   |
| Right adrenal gland                                      | 0.01177 ± 0.00021     | 0.01089 ± 0.00019     | 0.0092 ± 0.00016      |

|                                          |                       |                       |                       |
|------------------------------------------|-----------------------|-----------------------|-----------------------|
| Left adrenal gland                       | 0.01046 ± 0.00019     | 0.00972 ± 0.00018     | 0.00813 ± 0.00015     |
| Right breast adipose                     | 0.00897 ± 0.00021     | 0.00781 ± 0.00016     | 0.00676 ± 0.00012     |
| Right breast glandular                   | 0.00798 ± 0.00023     | 0.00686 ± 0.0002      | 0.00615 ± 0.00018     |
| Left breast adipose                      | 0.00933 ± 0.00022     | 0.00784 ± 0.00016     | 0.00671 ± 0.00012     |
| Left breast glandular                    | 0.00881 ± 0.00025     | 0.00711 ± 0.0002      | 0.00622 ± 0.00018     |
| Right breast (adipose + glandular)       | 0.00855 ± 0.00016     | 0.00746 ± 0.00013     | 0.00658 ± 0.0001      |
| Left breast (adipose + glandular)        | 0.00911 ± 0.00016     | 0.00758 ± 0.00013     | 0.00657 ± 0.0001      |
| Breast (adipose)                         | 0.00897 ± 0.00015     | 0.00781 ± 0.00011     | 0.006758 ± 0.000087   |
| Breast (glandular)                       | 0.00798 ± 0.00016     | 0.00686 ± 0.00014     | 0.00615 ± 0.00013     |
| Entire lenses of eye                     | 0.00933 ± 0.00084     | 0.00797 ± 0.00076     | 0.00513 ± 0.00057     |
| Sensitive lenses of eye                  | 0.0081 ± 0.0014       | 0.0101 ± 0.002        | 0.00374 ± 0.00099     |
| Right kidney cortex                      | 0.010856 ± 0.00005    | 0.009698 ± 0.000045   | 0.008381 ± 0.000039   |
| Right kidney medulla                     | 0.01128 ± 0.0001      | 0.009902 ± 0.000088   | 0.008562 ± 0.000076   |
| Right kidney pelvis                      | 0.011 ± 0.00021       | 0.00999 ± 0.00019     | 0.00861 ± 0.00016     |
| Right kidney (cortex + medulla + pelvis) | 0.010939 ± 0.000044   | 0.009746 ± 0.000039   | 0.008423 ± 0.000034   |
| Left kidney cortex                       | 0.010254 ± 0.00005    | 0.009032 ± 0.000043   | 0.007798 ± 0.000038   |
| Left kidney medulla                      | 0.010231 ± 0.000096   | 0.009164 ± 0.000086   | 0.007987 ± 0.000075   |
| Left kidney pelvis                       | 0.01055 ± 0.00021     | 0.0096 ± 0.00019      | 0.00806 ± 0.00016     |
| Left kidney (cortex + medulla + pelvis)  | 0.010261 ± 0.000044   | 0.009077 ± 0.000038   | 0.007842 ± 0.000033   |
| Right ovary                              | --                    | --                    | --                    |
| Left ovary                               | --                    | --                    | --                    |
| Pituitary gland                          | 0.01703 ± 0.00092     | 0.01524 ± 0.00084     | 0.01487 ± 0.00081     |
| Spinal cord                              | 0.01059 ± 0.000096    | 0.009073 ± 0.000083   | 0.007932 ± 0.000074   |
| Ureters                                  | 0.01363 ± 0.00016     | 0.01232 ± 0.00014     | 0.01085 ± 0.00012     |
| Adipose/residual tissue                  | 0.0092199 ± 0.0000046 | 0.0078156 ± 0.0000031 | 0.0066291 ± 0.0000027 |
| Total body                               | 0.0102291 ± 0.0000026 | 0.0088606 ± 0.0000021 | 0.0075807 ± 0.0000018 |
| $e_{DW}$ or $e$ (mSv/MBq)                | 0.0158446 ± 0.0000029 | 0.0141068 ± 0.0000024 | 0.0127004 ± 0.0000019 |
